# Supplementary material
Source: publisher site journal article supplement (https://www.dovepress.com/article/503984)
Supplement: Supplementary file 1 [file get_supplementary_file.php]

## Supplementary information

**Supplementary Table S1.** List of primers used for qPCR.

| <b>Target</b> | <b>Forward / reverse primer (5'–3')</b>           |
|---------------|---------------------------------------------------|
| <i>CSF3</i>   | CACTCTGGACAGTGCAGGAA/<br>AGAGAGTGTCCGAGCAGCA      |
| <i>PDPN</i>   | CTGCTCTTCGTTTTGGGAAG/<br>TTATAGCGGTCTTCGCTGGT     |
| <i>IL1A</i>   | GTAAGCTATGGCCCACTCCA/<br>AGGTGCTGACCTAGGCTTGA     |
| <i>IL6</i>    | CACAGACAGCCACTCACCTC/<br>AGTGCCTCTTTGCTGCTTTC     |
| <i>ACTA2</i>  | CCTATCCCCGGGACTAAGAC/<br>ACAATGGATGGGAAAACAGC     |
| <i>CCN2</i>   | CCTGGTCCAGACCACAGAGT/<br>TGGAGATTTTGGGAGTACGG     |
| <i>TAGLN</i>  | TCCAGGTCTGGCTGAAGAATGG/<br>CTGCTCCATCTGCTTGAAGACC |
| <i>MLY9</i>   | GGATGTGATTCGCAACGCCTTTG/<br>CGGTACATCTCGTCCACTTCT |
| <i>GADPH</i>  | AGCCACATCGCTCAGACAC /<br>GCCCAATACGACCAAATCC      |

**Supplementary Table S2.** Average percentages and 95% confidence interval of specific killing of Jeko-1-Luc and NCI-H929-Luc cells in response to CAR19 or CAR138 NK-92 cells in 2D culture.

| Conditions      |                    |                 | % Specific killing  |                     |              |
|-----------------|--------------------|-----------------|---------------------|---------------------|--------------|
|                 |                    |                 | means $\pm$ S.D.    | 95% CI              |              |
| Fig. 2C (left)  | Jeko-1-Luc (4 h)   | Luciferase      | WT NK-92 (1:1)      | 0.00 $\pm$ 0.00     | 0.00, 0.00   |
|                 |                    |                 | CAR19 NK-92 (1:1)   | 38.75 $\pm$ 5.45*** | 30.07, 47.43 |
|                 |                    |                 | WT NK-92 (2:1)      | 0.00 $\pm$ 0.00     | 0.00, 0.00   |
|                 |                    |                 | CAR19 NK-92 (2:1)   | 64.48 $\pm$ 1.90*** | 61.46, 67.49 |
|                 |                    | Annexin V/7-AAD | WT NK-92 (1:1)      | 5.23 $\pm$ 0.57     | 3.82, 6.65   |
|                 |                    |                 | CAR19 NK-92 (1:1)   | 51.07 $\pm$ 1.96*** | 46.21, 55.92 |
|                 |                    |                 | WT NK-92 (2:1)      | 9.00 $\pm$ 1.22     | 5.98, 12.02  |
|                 |                    |                 | CAR19 NK-92 (2:1)   | 65.40 $\pm$ 1.15*** | 62.54, 68.26 |
| Fig. 2C (right) | NCI-H929-Luc (4 h) | Luciferase      | WT NK-92 (1:10)     | 3.10 $\pm$ 3.93     | -3.16, 9.36  |
|                 |                    |                 | CAR138 NK-92 (1:10) | 49.03 $\pm$ 6.86*** | 38.12, 59.93 |
|                 |                    |                 | WT NK-92 (1:5)      | 18.70 $\pm$ 7.11    | 7.38, 30.02  |
|                 |                    |                 | CAR138 NK-92 (1:5)  | 62.98 $\pm$ 4.64*** | 55.59, 70.36 |
|                 |                    |                 | WT NK-92 (1:2)      | 47.08 $\pm$ 5.45    | 38.41, 55.74 |
|                 |                    |                 | CAR138 NK92 (1:2)   | 93.15 $\pm$ 2.82*** | 88.66, 97.64 |
|                 |                    | Annexin V/7-AAD | WT NK-92 (1:10)     | 10.83 $\pm$ 1.97    | 7.69, 13.96  |
|                 |                    |                 | CAR138 NK-92 (1:10) | 33.40 $\pm$ 4.85*** | 25.68, 41.12 |
|                 |                    |                 | WT NK-92 (1:5)      | 19.13 $\pm$ 5.13    | 10.96, 27.29 |
|                 |                    |                 | CAR138 NK-92 (1:5)  | 42.28 $\pm$ 4.51*** | 35.11, 49.44 |
|                 |                    |                 | WT NK-92 (1:2)      | 33.80 $\pm$ 5.91    | 24.40, 43.20 |
|                 |                    |                 | CAR138 NK-92 (1:2)  | 59.78 $\pm$ 2.64*** | 55.57, 63.98 |

\*\*\* $P < 0.001$  (power > 95%) versus WT NK-92 cells at the same concentration; two-sided Student's *t*-test.

**Supplementary Table S3.** Average percentages and 95% confidence interval of specific killing of NCI-H929-Luc cells in response to CAR138 NK-92 cells in the presence of activated stromal cells in 2D culture.

| Conditions         |                      | % Specific killing |                               |                                      |               |
|--------------------|----------------------|--------------------|-------------------------------|--------------------------------------|---------------|
|                    |                      | means $\pm$ S.D.   | 95% CI                        |                                      |               |
| Fig. 4B<br>(upper) | E:T = 1:10<br>(4 h)  | WT NK-92           | NCI-H929                      | 0.27 $\pm$ 0.46                      | -0.88, 1.41   |
|                    |                      |                    | + WI-38-40                    | 0.00 $\pm$ 0.00                      | 0.00, 0.00    |
|                    |                      |                    | + UE6E7T-3                    | 1.37 $\pm$ 2.37                      | -4.51, 7.25   |
|                    |                      | CAR138 NK-92       | NCI-H929                      | 40.43 $\pm$ 3.11                     | 32.70, 48.17  |
|                    |                      |                    | + WI-38-40                    | 15.30 $\pm$ 6.44 <sup>***</sup>      | -0.69, 31.29  |
|                    |                      |                    | + UE6E7T-3                    | 40.90 $\pm$ 7.18 <sup>###</sup>      | 23.07, 58.73  |
|                    | E:T = 1:5<br>(4 h)   | WT NK-92           | NCI-H929                      | 10.23 $\pm$ 1.30                     | 7.00, 13.47   |
|                    |                      |                    | + WI-38-40                    | 0.00 $\pm$ 0.00 <sup>*</sup>         | 0.00, 0.00    |
|                    |                      |                    | + UE6E7T-3                    | 2.60 $\pm$ 4.50                      | -8.59, 13.79  |
|                    |                      | CAR138 NK-92       | NCI-H929                      | 60.87 $\pm$ 5.83                     | 46.39, 75.35  |
|                    |                      |                    | + WI-38-40                    | 38.90 $\pm$ 4.23 <sup>***</sup>      | 25.38, 49.42  |
|                    |                      |                    | + UE6E7T-3                    | 56.57 $\pm$ 9.67 <sup>###</sup>      | 54.91, 58.22  |
|                    | E:T = 1:2<br>(4 h)   | WT NK-92           | NCI-H929                      | 39.07 $\pm$ 3.27                     | 30.94, 47.19  |
|                    |                      |                    | + WI-38-40                    | 6.17 $\pm$ 2.63 <sup>***</sup>       | -0.37, 12.70  |
|                    |                      |                    | + UE6E7T-3                    | 7.67 $\pm$ 9.62 <sup>***</sup>       | -16.24, 31.57 |
| CAR138 NK-92       |                      | NCI-H929           | 88.93 $\pm$ 0.51              | 87.66, 90.21                         |               |
|                    |                      | + WI-38-40         | 76.47 $\pm$ 0.72 <sup>*</sup> | 74.67, 78.26                         |               |
|                    |                      | + UE6E7T-3         | 83.03 $\pm$ 9.31              | 82.27, 83.79                         |               |
| Fig. 4B<br>(lower) | E:T = 1:10<br>(24 h) | WT NK-92           | NCI-H929                      | 0.00 $\pm$ 0.00                      | 0.00, 0.00    |
|                    |                      |                    | + WI-38-40                    | 0.00 $\pm$ 0.00                      | 0.00, 0.00    |
|                    |                      |                    | + UE6E7T-3                    | 0.00 $\pm$ 0.00                      | 0.00, 0.00    |
|                    |                      | CAR138 NK-92       | NCI-H929                      | 71.90 $\pm$ 1.83                     | 67.37, 76.43  |
|                    |                      |                    | + WI-38-40                    | 28.03 $\pm$ 3.86 <sup>***</sup>      | 18.46, 37.61  |
|                    |                      |                    | + UE6E7T-3                    | 70.30 $\pm$ 1.54 <sup>###</sup>      | 66.48, 74.12  |
|                    | E:T = 1:5<br>(24 h)  | WT NK-92           | NCI-H929                      | 26.40 $\pm$ 1.65                     | 22.31, 30.49  |
|                    |                      |                    | + WI-38-40                    | 0.00 $\pm$ 0.00 <sup>***</sup>       | 0.00, 0.00    |
|                    |                      |                    | + UE6E7T-3                    | 6.77 $\pm$ 3.50 <sup>***</sup>       | -1.93, 15.47  |
|                    |                      | CAR138 NK-92       | NCI-H929                      | 86.73 $\pm$ 0.76                     | 84.84, 88.63  |
|                    |                      |                    | + WI-38-40                    | 59.73 $\pm$ 5.20 <sup>***</sup>      | 46.81, 72.66  |
|                    |                      |                    | + UE6E7T-3                    | 89.50 $\pm$ 3.31 <sup>###</sup>      | 81.29, 97.71  |
|                    | E:T = 1:2<br>(24 h)  | WT NK-92           | NCI-H929                      | 61.10 $\pm$ 2.69                     | 54.42, 67.78  |
|                    |                      |                    | + WI-38-40                    | 11.17 $\pm$ 2.96 <sup>***</sup>      | 3.62, 18.51   |
|                    |                      |                    | + UE6E7T-3                    | 36.70 $\pm$ 9.13 <sup>***, ###</sup> | 13.02, 58.38  |
| CAR138 NK-92       |                      | NCI-H929           | 97.80 $\pm$ 0.95              | 95.43, 100.2                         |               |
|                    |                      | + WI-38-40         | 89.93 $\pm$ 1.51              | 86.07, 93.60                         |               |
|                    |                      | + UE6E7T-3         | 98.50 $\pm$ 0.26              | 97.84, 99.16                         |               |

<sup>\*</sup> $P < 0.05$ , <sup>\*\*\*</sup> $P < 0.001$  (power > 95%) versus 2D culture of NCI-H929-Luc cells alone under the same conditions; <sup>###</sup> $P < 0.001$  (power > 78%) versus NCI-H929-Luc with WI-38-40 cells under the same conditions; one-way ANOVA with Tukey's post-test.

**Supplementary Table S4.** Average percentages and 95% confidence interval of specific killing of NCI-H929-Luc cells in response to CAR138 NK-92 cells in 3D MM spheroids.

| Conditions |                        |                      | % Specific killing   |              |
|------------|------------------------|----------------------|----------------------|--------------|
|            |                        |                      | means $\pm$ S.D.     | 95% CI       |
| Fig. 5E    | NCI-H929-Luc<br>(4 h)  | WT NK-92 (25000)     | 5.18 $\pm$ 3.47      | -0.35, 10.70 |
|            |                        | CAR138 NK-92 (25000) | 18.23 $\pm$ 2.88**   | 13.63, 22.82 |
|            |                        | WT NK-92 (50000)     | 17.03 $\pm$ 7.21     | 5.55, 28.50  |
|            |                        | CAR138 NK-92 (50000) | 33.83 $\pm$ 5.54*    | 25.01, 42.64 |
|            | NCI-H929-Luc<br>(8 h)  | WT NK-92 (25000)     | 17.73 $\pm$ 2.49     | 13.77, 21.68 |
|            |                        | CAR138 NK-92 (25000) | 40.35 $\pm$ 7.40**   | 28.58, 52.12 |
|            |                        | WT NK-92 (50000)     | 34.73 $\pm$ 4.82     | 27.05, 42.40 |
|            |                        | CAR138 NK-92 (50000) | 58.45 $\pm$ 6.62**   | 47.91, 68.99 |
|            | NCI-H929-Luc<br>(24 h) | WT NK-92 (25000)     | 15.43 $\pm$ 3.23     | 10.28, 20.57 |
|            |                        | CAR138 NK-92 (25000) | 62.15 $\pm$ 13.51*** | 40.65, 83.65 |
|            |                        | WT NK-92 (50000)     | 31.20 $\pm$ 5.90     | 21.82, 40.58 |
|            |                        | CAR138 NK-92 (50000) | 78.20 $\pm$ 8.12***  | 65.28, 91.12 |

\* $P < 0.05$ , \*\* $P < 0.01$ , \*\*\* $P < 0.001$  (power > 95%) versus WT NK-92 cells at the same conditions; two-sided Student's *t*-test.

**Supplementary Table S5.** Average percentages and 95% confidence interval of specific killing of NCI-H929-Luc cells in response to CAR138 NK-92 cells in the presence or absence of activated stromal cells in 3D MM spheroids.

| Conditions                   |                    |                                 | % Specific killing               |                                |              |
|------------------------------|--------------------|---------------------------------|----------------------------------|--------------------------------|--------------|
|                              |                    |                                 | means $\pm$ S.D.                 | 95% CI                         |              |
| Fig. 6D<br>(upper)           | NK 25000<br>(4 h)  | WT NK-92                        | NCI-H929                         | 1.00 $\pm$ 2.45                | -1.57, 3.57  |
|                              |                    |                                 | + WI-38-40                       | 0.82 $\pm$ 2.00                | -1.28, 2.91  |
|                              | CAR138 NK-92       | NCI-H929                        | 23.92 $\pm$ 4.89                 | 18.78, 29.05                   |              |
|                              |                    | + WI-38-40                      | 1.23 $\pm$ 3.02 <sup>***</sup>   | -1.94, 4.40                    |              |
|                              | NK 50000<br>(4 h)  | WT NK-92                        | NCI-H929                         | 25.17 $\pm$ 4.91               | 20.02, 30.32 |
|                              |                    |                                 | + WI-38-40                       | 18.50 $\pm$ 2.96 <sup>*</sup>  | 15.40, 21.60 |
| CAR138 NK-92                 | NCI-H929           | 60.05 $\pm$ 5.17                | 54.62, 65.48                     |                                |              |
|                              | + WI-38-40         | 41.75 $\pm$ 9.56 <sup>**</sup>  | 31.68, 51.82                     |                                |              |
| Fig. 6D<br>(lower,<br>left)  | NK 25000<br>(8 h)  | WT NK-92                        | NCI-H929                         | 28.90 $\pm$ 8.10               | 20.40, 37.40 |
|                              |                    |                                 | + WI-38-40                       | 14.85 $\pm$ 4.93 <sup>**</sup> | 9.67, 20.03  |
|                              | CAR138 NK-92       | NCI-H929                        | 56.38 $\pm$ 5.38                 | 50.74, 62.03                   |              |
|                              |                    | + WI-38-40                      | 28.72 $\pm$ 5.47 <sup>***</sup>  | 22.98, 34.46                   |              |
|                              | NK 50000<br>(8 h)  | WT NK-92                        | NCI-H929                         | 57.68 $\pm$ 6.00               | 51.38, 63.98 |
|                              |                    |                                 | + WI-38-40                       | 51.58 $\pm$ 15.79              | 35.02, 68.15 |
| CAR138 NK-92                 | NCI-H929           | 86.05 $\pm$ 3.22                | 82.67, 89.43                     |                                |              |
|                              | + WI-38-40         | 77.82 $\pm$ 12.08               | 65.14, 90.49                     |                                |              |
| Fig. 6D<br>(lower,<br>right) | NK 25000<br>(24 h) | WT NK-92                        | NCI-H929                         | 32.10 $\pm$ 5.58               | 26.24, 37.96 |
|                              |                    |                                 | + WI-38-40                       | 37.93 $\pm$ 13.30              | 23.97, 51.89 |
|                              | CAR138 NK-92       | NCI-H929                        | 70.83 $\pm$ 6.46                 | 64.06, 77.61                   |              |
|                              |                    | + WI-38-40                      | 61.55 $\pm$ 6.77 <sup>*</sup> #1 | 54.45, 68.65                   |              |
|                              | NK 50000<br>(24 h) | WT NK-92                        | NCI-H929                         | 41.87 $\pm$ 3.51               | 38.18, 45.55 |
|                              |                    |                                 | + WI-38-40                       | 53.98 $\pm$ 6.01 <sup>**</sup> | 47.68, 60.29 |
| CAR138 NK-92                 | NCI-H929           | 88.32 $\pm$ 3.73                | 84.40, 92.23                     |                                |              |
|                              | + WI-38-40         | 77.03 $\pm$ 2.82 <sup>***</sup> | 74.07, 79.99                     |                                |              |

\* $P < 0.05$ , \*\* $P < 0.01$ , \*\*\* $P < 0.001$  (power > 80%; except for remark #1 at power ~70%) versus 3D culture of NCI-H929-Luc cells alone under the same conditions; two-sided Student's *t*-test.

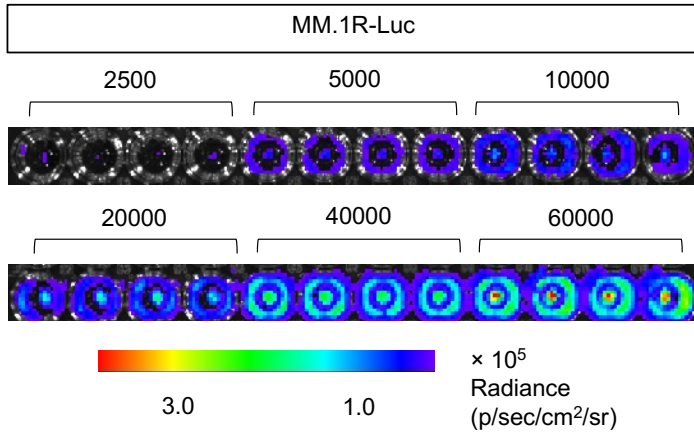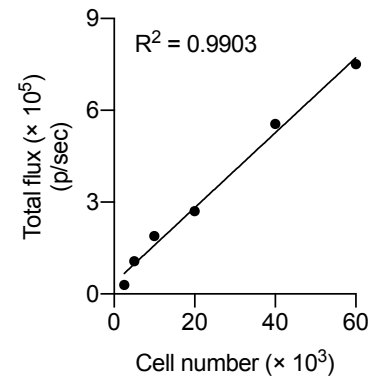

**Supplementary Figure S1.** Luciferase activity in human MM MM.1R-Luc cells was assessed by IVIS bioluminescence imaging. Data showed a linear correlation between luminescence signal (total flux) and cell number.

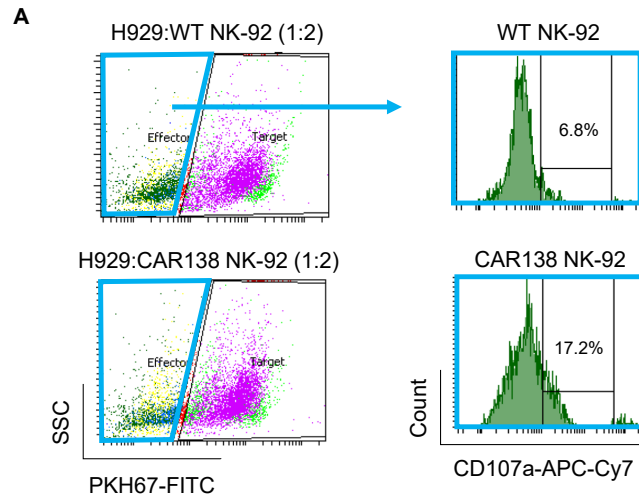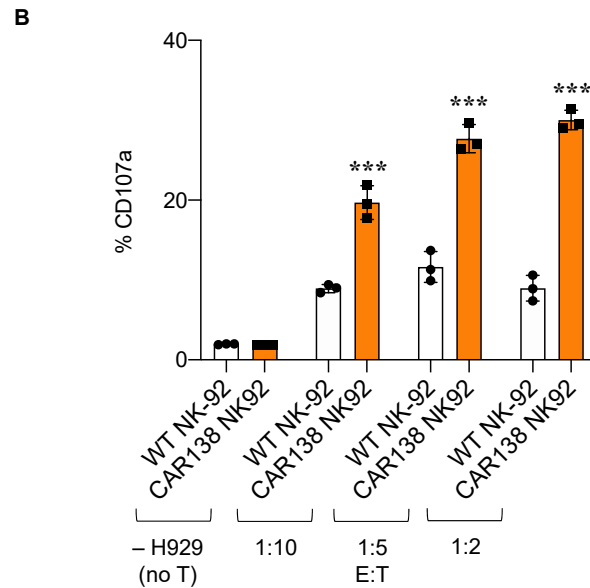

**Supplementary Figure S2.** Flow cytometric analysis of CD107a in NK cells upon NCI-H929 exposure. WT or CAR138 NK-92 cells were exposed to NCI-H929 cells at various E:T ratios for 4 h. (A) Representative flow cytometric analysis of CD107a, a functional NK marker, in WT or CAR138 NK-92 cells. (B) Percentages of CD107a in WT or CAR138 NK-92 cells at various E:T ratios were shown. \*\*\* $P < 0.001$  versus WT NK-92 cells at the same E:T ratio; two-sided Student's  $t$ -test.

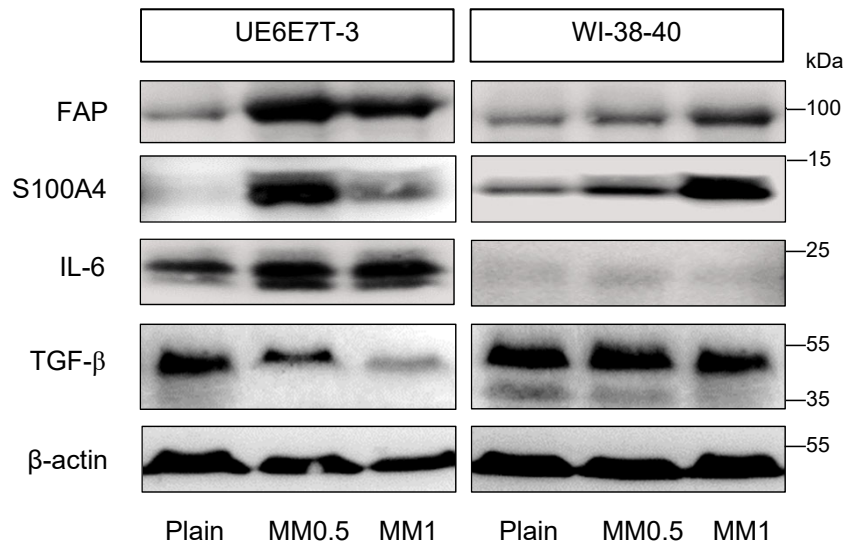

**Supplementary Figure S3.** Western blot analysis of common CAF markers in UE6E7T-3 and WI-38-40 cells upon exposure to various concentrations of MM-CM, i.e., MM0.5-CM and MM1-CM, at 48 h.

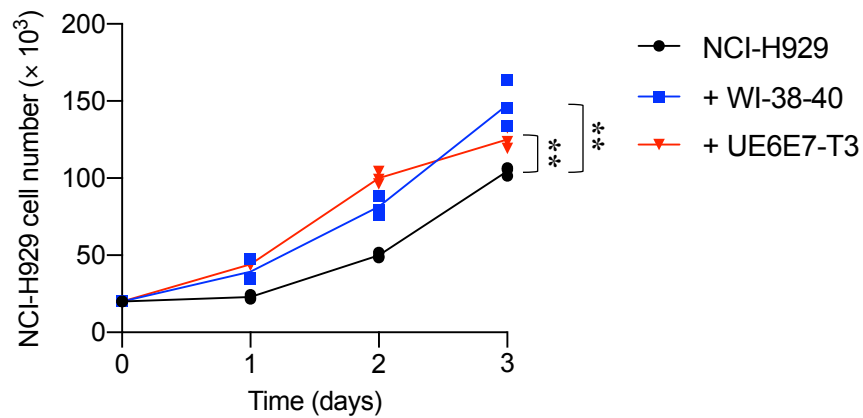

**Supplementary Figure S4.** Activated stromal cells promoted MM cell proliferation in 2D culture. NCI-H929-Luc cells were cocultured with WI-38-40 and UE6E7-T3 cells activated by MM-CM, and NCI-H929 cell number was evaluated by luciferase assay.  $**P < 0.05$  versus NCI-H929 cells alone at day 3; two-sided Student's *t*-test.

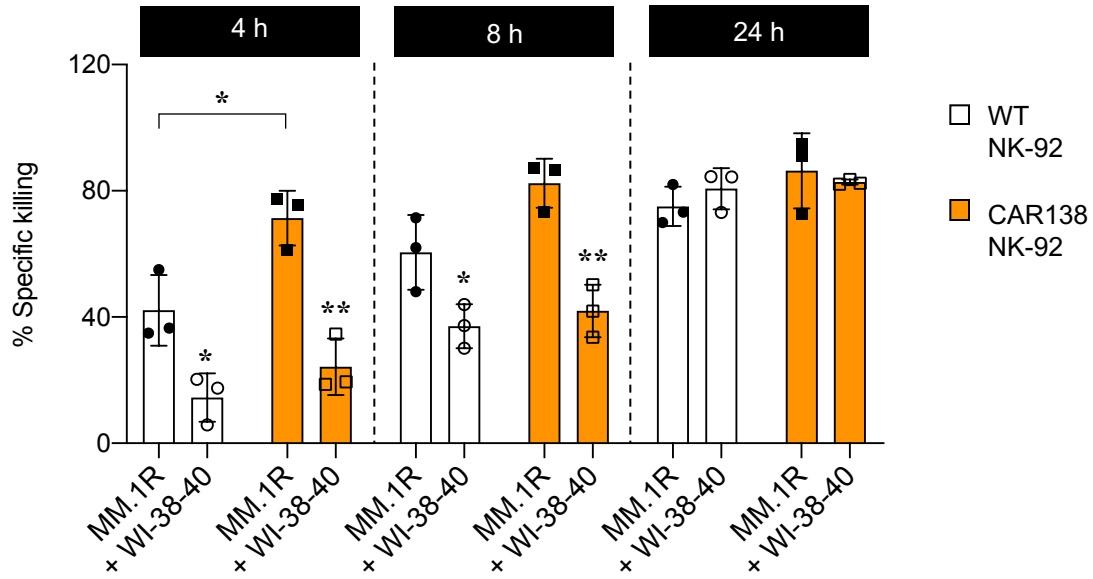

**Supplementary Figure S5.** Percentages of specific killing of MM.1R-Luc cells in 3D MM/CAF spheroids (formed for 2 days) in response to WT and CAR138 NK-92 cells at 25000 cells at 4–24 h as evaluated by luciferase assay. \* $P < 0.05$ , \*\* $P < 0.01$  versus bare 3D MM spheroids without activated stromal cells under the same conditions or as indicated; two-sided Student's *t*-test.
